# Supplementary material for: Implementing a toolkit for the prevention, management and control of carbapenemase-producing Enterobacteriaceae in English acute hospitals trusts: a qualitative evaluation
Source: Springer Nature journal article supplement (doi:10.1186/s12913-019-4492-4), 2019-10-12
Supplement: MOESM1 [file 17267054]

## Supplement 1 – Flowchart of the evaluation frameworks and research process linkage

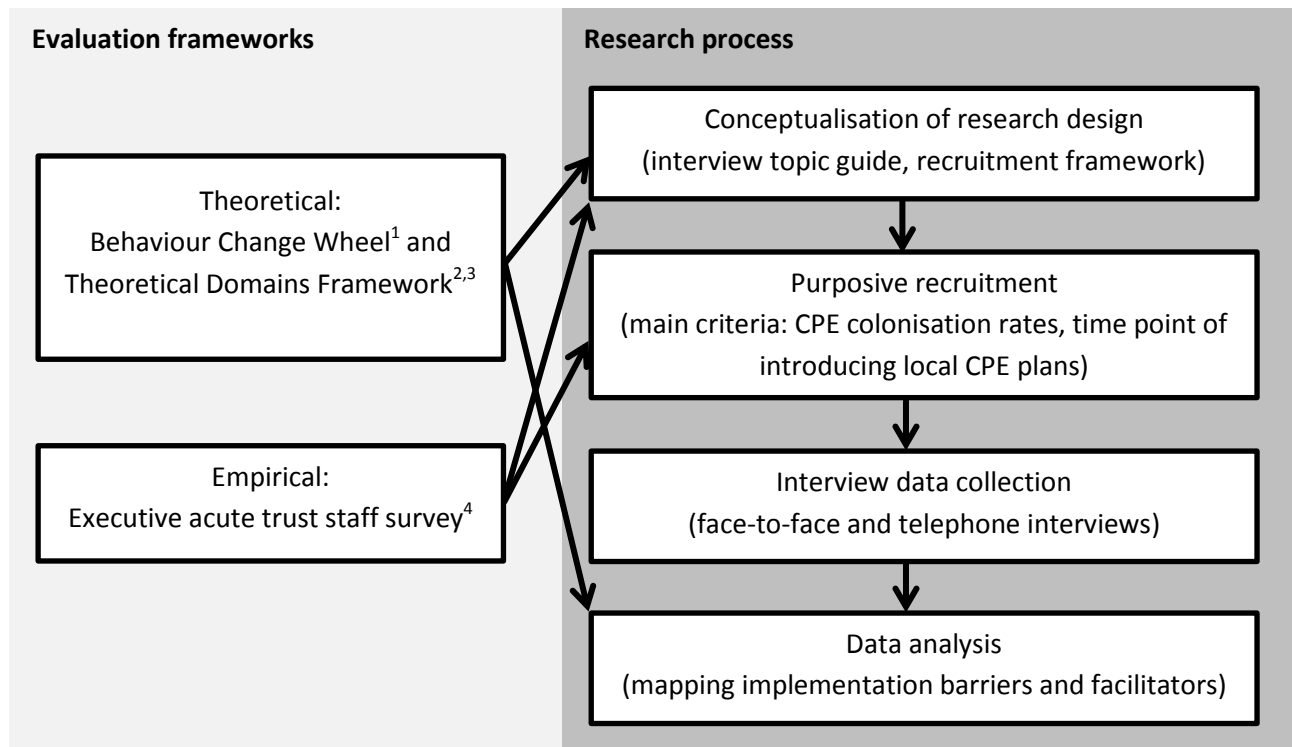

Figure 1: Illustration of the evaluation frameworks and research process linkage.

---

<sup>1</sup>Michie S, van Stralen MM, West R, Grimshaw J, Shirran L, Thomas R, et al. The behaviour change wheel: a new method for characterising and designing behaviour change interventions. *Implement Sci.* 2011;6:42.

<sup>2</sup>Atkins L, Francis J, Islam R, O'Connor D, Patey A, Ivers N, et al. A guide to using the Theoretical Domains Framework of behaviour change to investigate implementation problems. *Implement Sci.* 2017;12:77.

<sup>3</sup>Cane J, O'Connor D, Michie S. Validation of the theoretical domains framework for use in behaviour change and implementation research. *Implement Sci.* 2012;7:37.

<sup>4</sup>Coope CM, Verlander NQ, Schneider A, Hopkins S, Welfare W, Johnson AP, et al. An evaluation of a toolkit for the early detection, management, and control of carbapenemase-producing Enterobacteriaceae: a survey of acute hospital trusts in England. *J Hosp Infect.* 2018;99:381–9.
