# Supplementary material for: Implementing a toolkit for the prevention, management and control of carbapenemase-producing Enterobacteriaceae in English acute hospitals trusts: a qualitative evaluation
Source: Springer Nature journal article supplement (doi:10.1186/s12913-019-4492-4), 2019-10-12
Supplement: MOESM2 [file 17267054]

## Supplement 2 – Interview participation per trust

- Trust 1 (no CPE cases / pre-CPE toolkit): 2 interview participants
- Trust 2 (no CPE cases / early adopter): 4 interview participants
- Trust 3 (no CPE cases / late adopter): 5 interview participants
- Trust 4 (some CPE cases / pre-CPE toolkit): 5 interview participants
- Trust 5 (some CPE cases / early adopter): 5 interview participants
- Trust 6 (some CPE cases / early adopter): 2 interview participants
- Trust 7 (some cases / late adopter): 2 interview participants
- Trust 8 (many CPE cases / pre-CPE toolkit): 3 interview participants
- Trust 9 (many CPE cases / early adopter): 5 interview participants
- Trust 10 (many CPE cases / early adopter): 2 interview participants
- Trust 11 (many CPE cases / late adopter): 5 interview participants
- Trust 12 (many CPE cases / late adopter): 4 interview participants
